# Supplementary material for: Influence of Prior Authorization Requirements on Provider Clinical Decision Making
Source: Research Square preprint supplement (doi:10.21203/rs.3.rs-759967/v1), 2021-08-03
Supplement: Supplementary file 1 [file 1aec63230deeb85cea2a7cdc.pdf]

Table 2. Associations between Practice Characteristics and Perceived Burdens for PA and Provider Prescribing Behaviors

| Structural Path Coefficient          |                                |               |                        |                |                   |                |
|--------------------------------------|--------------------------------|---------------|------------------------|----------------|-------------------|----------------|
| Measure                              | Prescribe Different Medication |               | Avoid Newer Medication |                | Modify Diagnosis  |                |
| Statistics                           | $\beta$                        | 95% CI        | $\beta$                | 95% CI         | $\beta$           | 95% CI         |
| Perceived Practice Burden Risk Index | 0.07*                          | 0.011 – 0.129 | –0.04                  | –0.101 – 0.019 | 0.13***           | 0.069 – 0.190  |
| Step Therapy Requirements            | 0.22***                        | 0.166 – 0.279 | 0.24***                | 0.188 – 0.302  | 0.11***           | 0.054 – 0.173  |
| Patient Load                         | 0.08**                         | 0.028 – 0.137 | 0.04                   | –0.013 – 0.098 | 0.06 <sup>m</sup> | –0.001 – 0.112 |
| Health Plan Requirements             | 0.11**                         | 0.040 – 0.188 | 0.15***                | 0.079 – 0.228  | 0.08*             | 0.009 – 0.162  |
| Health Plan Communication Issues     | 0.11**                         | 0.035 – 0.181 | 0.08*                  | 0.002 – 0.149  | 0.10**            | 0.029 – 0.178  |

Notes: Model is not trimmed for nonsignificant effects.  $\beta$ , standardized coefficients; CI, confidence interval. Model parameters are for fully saturated model. Negative signs indicate suppression in light of the positive zero-order associations among these measures. Questions: In what percentage of cases do you prescribe a different medication than initially planned, due to prior authorization delays; How often do you avoid prescribing newer medications due to anticipated difficulties with prior authorization, even if you feel patients meet evidence-based guidelines for their use; How often have you modified a diagnosis to obtain a prior authorization.

\*  $P < .05$ ; \*\*  $P < .01$ ; \*\*\*  $P < .001$ ; <sup>m</sup> = marginal effect  $P < .06$
